# Supplementary material
Source: PubMed Central journal article supplement (PMC4532662)
Supplement: NIHMS652001-supplement-supplement_1.pdf [file NIHMS652001-supplement-supplement_1.pdf]

quantified using the Imaris software (Bitplane). Each figure is representative of at least three experiments. Error bars = SD. 400x magnification. (e) Uptake of Salmonella typhimurium by CD11c-eYFP<sup>+</sup> cells derived from the murine nose and mediastinal lymph node is compared between PBS and PTX administered mice at 5 min, 35 min and 12h post administration using two-photon microscopy.

**Figure 8. Identification of DCs in human nasal mucosa.** (a) Live CD45<sup>+</sup> mononuclear CD3<sup>-</sup> CD20<sup>-</sup> CD335<sup>-</sup> CD66b<sup>-</sup> CD14<sup>-</sup> cells, i.e., T, B, NK, neutrophils and monocyte excluded cells were analyzed for BDCA-1, 2, 3 markers. Three DC populations are shown: BDCA-1<sup>+</sup> myeloid DCs (left), BDCA-2<sup>+</sup> plasmacytoid DCs (middle), BDCA-3<sup>hi</sup> myeloid DCs (right). (b) Frequency of BDCA-1<sup>+</sup> cells, BDCA-2<sup>+</sup> cells and BDCA-3<sup>hi</sup> cells as a percent of CD45<sup>+</sup> mononuclear cells of Normal, CRS, or CRS with nasal polys. Composite data from 20 donors are shown. \* p<0.05.

**Supplementary figure 1.** Three-dimensional reconstruction from two-photon microscopy data, represented as a movie, showing CD11c-eYFP<sup>+</sup> DCs in green and second-harmonics signals from collagen in blue.

**Supplementary figure 2.** Surface expression of CD24 and CD64 on nasal DCs. (a) Live CD45<sup>+</sup>CD11c<sup>+</sup>MHCII<sup>+</sup>CD103<sup>-</sup>CD11b<sup>+</sup>F4/80<sup>+</sup> cells were examined for the expression of CD24.

**Supplementary figure 3.** Comparison of the indicated cell populations in the nasal tissue of a cohort of normal human volunteers with patients with CRS without and with nasal polyps. \*  $p < 0.05$

**Supplementary figure 4.** Antibodies used for CYTOF assays.

# Supplementary figure 1

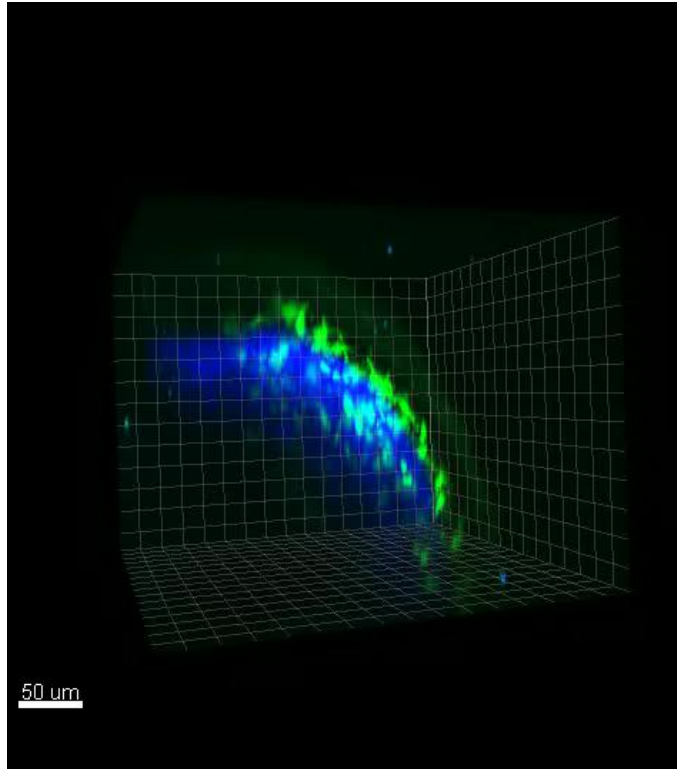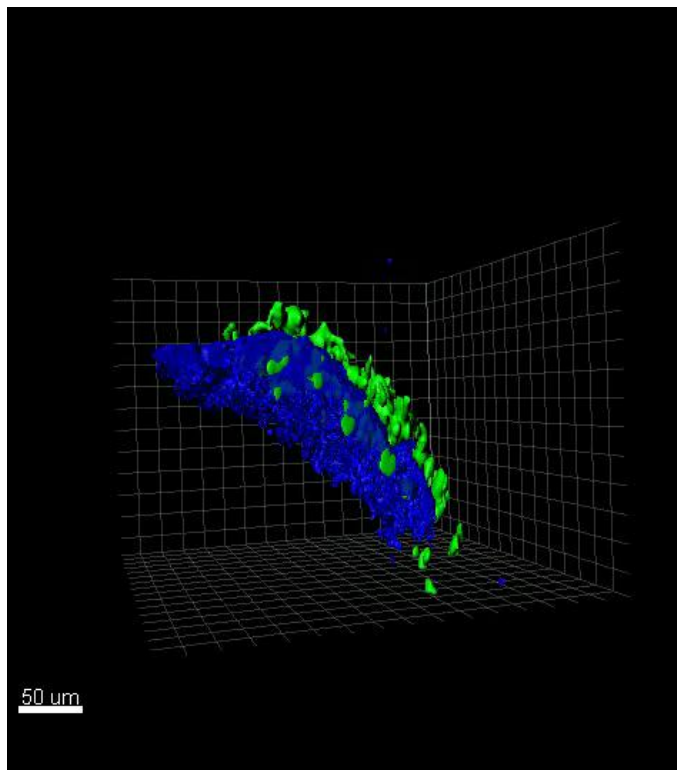

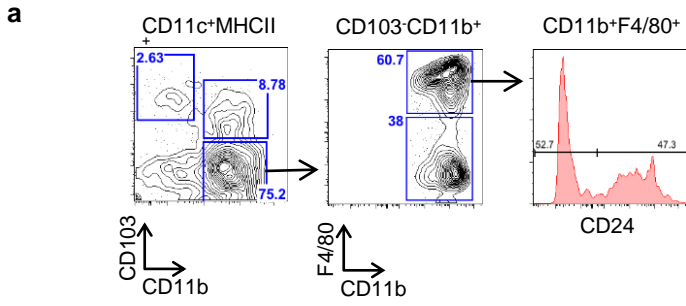

# Supplementary figure 3

a

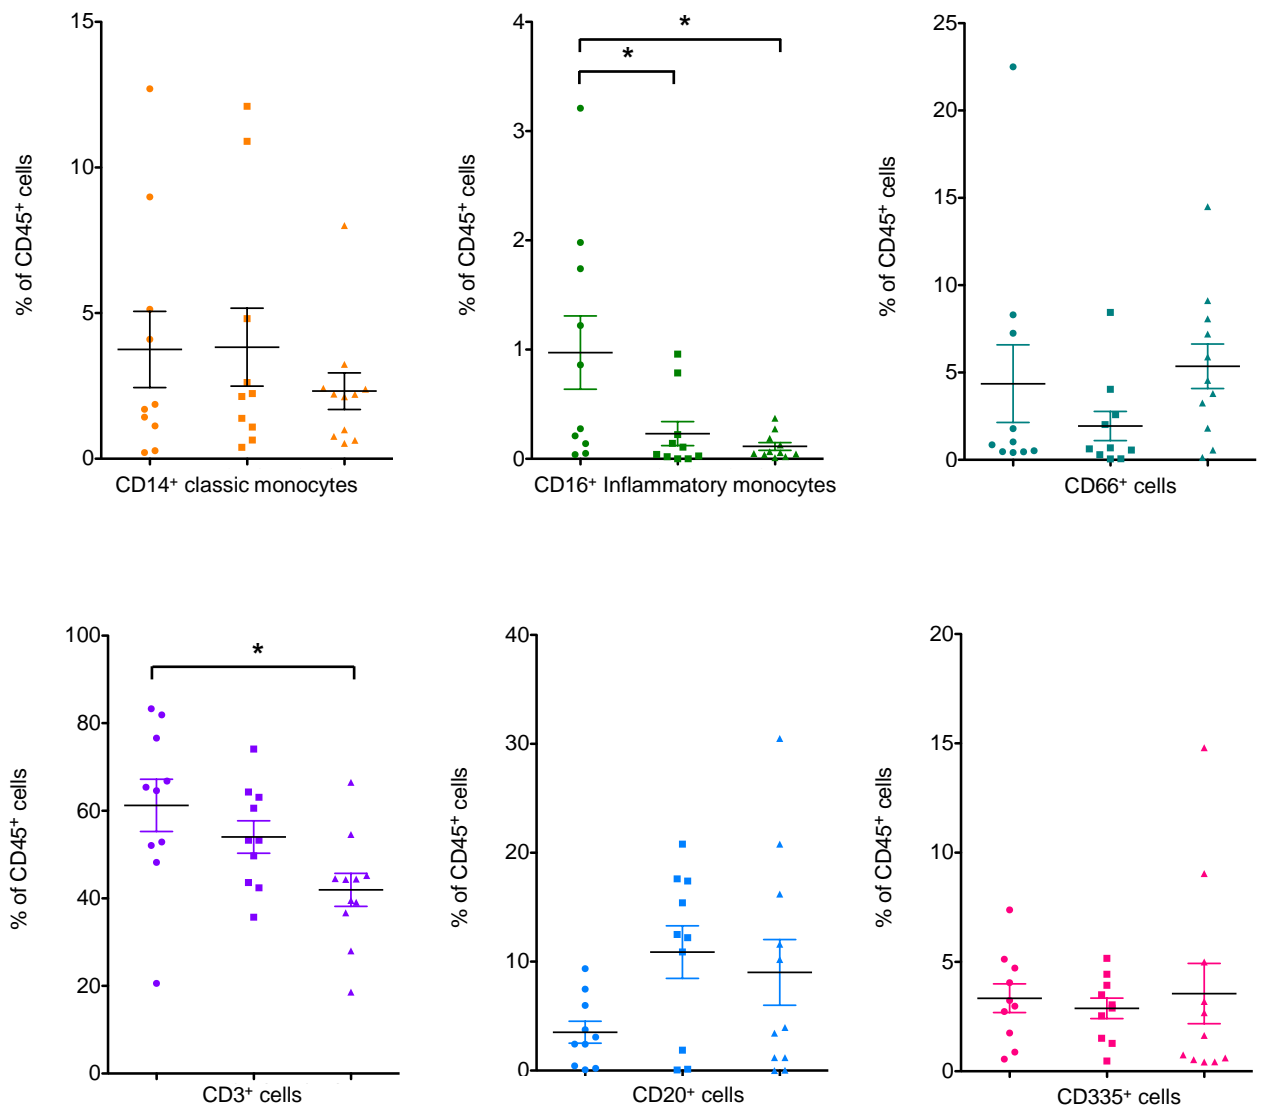

## Clinical Characteristics of human volunteers

### Group I : Normal

| <u>Study No.</u> | <u>Age (yr)</u> | <u>Sex (M/F)</u> | <u>Steroids (Yes/No)</u> | <u>Antibiotics (Yes/No)</u> | <u>Tissue analyzed</u> | <u>Indication for surgery</u> | <u>Concomitant medications</u>                                                                                                                                                                         |
|------------------|-----------------|------------------|--------------------------|-----------------------------|------------------------|-------------------------------|--------------------------------------------------------------------------------------------------------------------------------------------------------------------------------------------------------|
| B1               | 67              | M                | No                       | No                          | Nasal Biopsy           | Epistaxis                     | Diazepam, clonazepam, atorvastatin, quinapril, amlodipine                                                                                                                                              |
| B6               | 41              | M                | Topical                  | No                          | Nasal Biopsy           | Ameloblastoma                 | Calcipotriene/betamethasone                                                                                                                                                                            |
| BA23             | 25              | M                | No                       | No                          | Adenoid                | Deviated nasal septum         | None                                                                                                                                                                                                   |
| B24              | 33              | M                | Yes                      | Yes                         | Nasal Biopsy           | Pituitary macroadenoma        | Armodafinil, augmentin, prednisone                                                                                                                                                                     |
| B25              | 64              | F                | Yes                      | No                          | Nasal Biopsy           | Pituitary macroadenoma        | Mometasone, montelukast, prednisone, levothyroxine, citalopram, fenofibrate, chlordiazepoxide-clidinium, pancrelipase, esomeprazole, vit d, vit b complex, calcium carbonate, multivitamin, folic acid |
| BS27             | 65              | F                | No                       | No                          | Sinus Mucosa           | Pituitary macroadenoma        | Benazepril-hydrochlorothiazide                                                                                                                                                                         |
| B28              | 53              | F                | No                       | No                          | Nasal Biopsy           | Meningioma                    | Lithium carbonate, oxycodone                                                                                                                                                                           |
| B29              | 82              | F                | No                       | No                          | Sinus Mucosa           | Pituitary macroadenoma        | Simvastatin, metformin, omeprazole, enalapril                                                                                                                                                          |
| B30              | 50              | F                | No                       | No                          | Nasal Biopsy           | Pituitary macroadenoma        | None                                                                                                                                                                                                   |
| B32              | 38              | F                | No                       | No                          | Nasal Biopsy           | Pituitary macroadenoma        | Amlodipine, hydrochlorothiazide, acetaminophen, ondansetron                                                                                                                                            |

## Group II : CRS

| <u>Study No.</u> | <u>Age (yr)</u> | <u>Sex (M/F)</u> | <u>Steroids (Yes/No)</u> | <u>Antibiotics (Yes/No)</u> | <u>Tissue analyzed</u> | <u>Indication for surgery</u> | <u>Concomitant medications</u>                                                            |
|------------------|-----------------|------------------|--------------------------|-----------------------------|------------------------|-------------------------------|-------------------------------------------------------------------------------------------|
| B2               | 41              | M                | No                       | No                          | Nasal Biopsy           | CRS                           | Tamsulosin, esomeprazole                                                                  |
| BA3              | 41              | M                | No                       | No                          | Adenoid                | CRS                           | Tamsulosin, esomeprazole                                                                  |
| B4               | 54              | M                | No                       | No                          | Nasal Biopsy           | CRS with nasal polyps         | Escitalopram, esomeprazole                                                                |
| BA5              | 54              | M                | No                       | No                          | Adenoid                | CRS with nasal polyps         | Escitalopram, esomeprazole                                                                |
| B7               | 40              | F                | No                       | Yes                         | Nasal Biopsy           | CRS, R maxillary sinus lesion | Azithromycin, sitagliptan-metformin, lisinopril, glimepiride                              |
| B8               | 61              | M                | Yes                      | No                          | Nasal Biopsy           | CRS with nasal polyps         | Tiotropium, prednisone, mometason/formoterol, montelukast, budesonide, saw palmetto       |
| B9               | 61              | M                | Yes                      | No                          | Nasal Biopsy           | CRS with nasal polyps         | Tiotropium, prednisone, mometason/formoterol, montelukast, budesonide, saw palmetto       |
| B10              | 33              | M                | No                       | No                          | Nasal Biopsy           | CRS with nasal polyps         | Zileuton, omalizumab                                                                      |
| BA11             | 33              | M                | No                       | No                          | Adenoid                | CRS with nasal polyps         | Zileuton, omalizumab                                                                      |
| B12              | 50              | M                | Yes                      | Yes                         | Nasal Biopsy           | CRS with nasal polyps         | Moxifloxacin, prednisone, spironolactone, mokelukast, sodium chloride solution, verapamil |
| B13              | 75              | F                | Yes                      | Yes                         | Nasal Biopsy           | CRS                           | Prednisone, amoxicillin                                                                   |
| B14              | 75              | F                | Yes                      | Yes                         | Nasal Biopsy           | CRS                           | Prednisone, amoxicillin                                                                   |
| BA15             | 75              | F                | Yes                      | Yes                         | Adenoid                | CRS                           | Prednisone, amoxicillin                                                                   |
| B16              | 42              | F                | No                       | No                          | Nasal Biopsy           | CRS                           | Fluoxetine                                                                                |
| BS17             | 42              | F                | No                       | No                          | Sinus Mucosa           | CRS                           | Fluoxetine                                                                                |
| B18              | 42              | F                | No                       | No                          | Nasal Biopsy           | CRS                           | Fluoxetine                                                                                |
| BA19             | 51              | F                | Yes                      | Yes                         | Adenoid                | CRS with nasal polyps         | Esomeprazole, levofloxacin, prednisone                                                    |
| B20              | 51              | F                | Yes                      | Yes                         | Nasal Biopsy           | CRS with nasal polyps         | Esomeprazole, levofloxacin, prednisone                                                    |
| BS21             | 51              | F                | Yes                      | Yes                         | Sinus Mucosa           | CRS with nasal polyps         | Esomeprazole, levofloxacin, prednisone                                                    |
| BS22             | 51              | F                | Yes                      | Yes                         | Sinus Mucosa           | CRS with nasal polyps         | Esomeprazole, levofloxacin, prednisone                                                    |
| BA26             | 49              | M                | No                       | No                          | Adenoid                | CRS, encephalocele            | None                                                                                      |

## Antibodies used for immunofluorescent microscopy

| Antibody       | Fluorochrome | Specificity   | Clone    | Final concentration | Source                             | Secondary antibody      | Third antibody |
|----------------|--------------|---------------|----------|---------------------|------------------------------------|-------------------------|----------------|
| CD3            | Purified     | CD3           | 145-2C11 | 3 µg/µl             | Abcam                              | Alexa 488;<br>Alexa 647 |                |
| CD11c          | Purified     | αxβ2 integrin | RM4-5    | 3 µg/µl             | BD                                 | Anti-hamster<br>Biotin  | SA- Alexa 555  |
| B220           | Purified     | CD45R         | 53-6.7   | 2 µg/µl             | eBioscience                        | Alexa 647               |                |
| Cytokeratin 18 | Purified     | CK18          |          | 2 µg/µl             | Abcam                              | Alexa 488               |                |
| LYVE1          | Purified     | LYVE1         | ab14917  | 2 µg/µl             | Abcam                              | Alexa 488               |                |
| CD31           | Purified     | PECAM1        | MEC13.3  | 2 µg/µl             | BD                                 | Alexa 488               |                |
| CD207          | Purified     | Langerin      | L31; E17 | 3 µg/µl             | eBioscience,<br>Santa Cruz Biotech | Alexa 488               |                |



Antibodies used for mouse flow cytometry

| Antibody | Fluorochrome      | Clone       |
|----------|-------------------|-------------|
| B220     | A647; PerCP Cy5.5 | RA3-6B2     |
| CD3ε     | A700; Pe-Cy7      | 145-2C11    |
| CD4      | PerCP Cy5.5       | RM4-5       |
| CD8α     | APC               | 53-6.7      |
| CD103    | BV421             | 2E7         |
| CD11b    | A488              | M1/70       |
| CD11c    | Pe-Cy7            | N418        |
| CD45     | PerCP             | 30-F11      |
| F4/80    | BV421             | BM8         |
| TLR3     | APC               | 11F8        |
| TCR Vα2  | APC               | B20.1       |
| CD14     | APC               | Sa14-2      |
| CD206    | APC               | C068C2      |
| EpCAM    | APC               | G8.8        |
| CD24     | APC               | M1/69       |
| CD64     | PE                | X54-5/7.1   |
| Ly6C     | BV421             | HK1.4       |
| LY6G     | APC               | RB6-8C5     |
| CD115    | APC               | AFS98       |
| MHCII    | A700              | M5/114.15.2 |
| CD19     | PerCP Cy5.5       | 6D5         |
| CD207    | PE                | L31         |
| CD317    | PE                | 129c        |
| NK 1.1   | PerCP             | PK136       |

All antibodies are from BD biosciences, Biolegend, or eBioscience.

Antibodies used for CYTOF assays

| Isotope              | Antibody | Clone       | Source        |
|----------------------|----------|-------------|---------------|
| <b>Cd (Qdot-655)</b> | Thy1.2   | 53-2.1      | eBioscience   |
| <b>141 Pr</b>        | Ly6G     | 1A8         | Biolegend     |
| <b>142 Nd</b>        | CD11c    | N418        | Fluidigm      |
| <b>147 Sm</b>        | CD45     | 30-F11      | Fluidigm      |
| <b>148 Nd</b>        | CD11b    | M1/70       | Fluidigm      |
| <b>149 Sm</b>        | CD19     | 6D5         | Fluidigm      |
| <b>150Nd</b>         | CD24     | M1/69       | Fluidigm      |
| <b>152Sm</b>         | Siglec F | E50-2440    | BD Bioscience |
| <b>153 Eu</b>        | CD317    | 927         | Biolegend     |
| <b>154 Sm</b>        | TER119   | TER119      | Fluidigm      |
| <b>156 Gd</b>        | CD64     | X54-5/7.1   | Biolegend     |
| <b>162 Dy</b>        | Ly6C     | HK1.4       | Biolegend     |
| <b>164Dy</b>         | CD103    | 2E7         | Biolegend     |
| <b>166Er</b>         | CD117    | 2B8         | Fluidigm      |
| <b>169 Tm</b>        | TCRb     | H57-597     | Fluidigm      |
| <b>170 Er</b>        | NK1.1    | PK136       | Fluidigm      |
| <b>174 Yb</b>        | MHCII    | M5/114.15.2 | Fluidigm      |
| <b>175Lu</b>         | CD135    | A2F10       | eBioscience   |
| <b>176 Yb</b>        | B220     | RA3-6B2     | Fluidigm      |
